# Supplementary material for: Reactive oxygen species on indoor surfaces
Source: Royal Society of Chemistry journal article supplement (doi:10.1039/d4em00031e), 2024-01-01
Supplement: d4em00031e1.pdf [file d4em00031e1.pdf]

1 **Supplemental Information (SI)**

2 *Reactive Oxygen Species on Indoor Surfaces*

3 *Zhenduo Yao<sup>a</sup>, Glenn Morrison<sup>a\*</sup>*

4 a. Department of Environmental Sciences and Engineering, Gillings School of Global Public  
5 Health, University of North Carolina at Chapel Hill, Chapel Hill, NC, United States

6 \*Corresponding Author:

7 Email: [glennmor@email.unc.edu](mailto:glennmor@email.unc.edu)

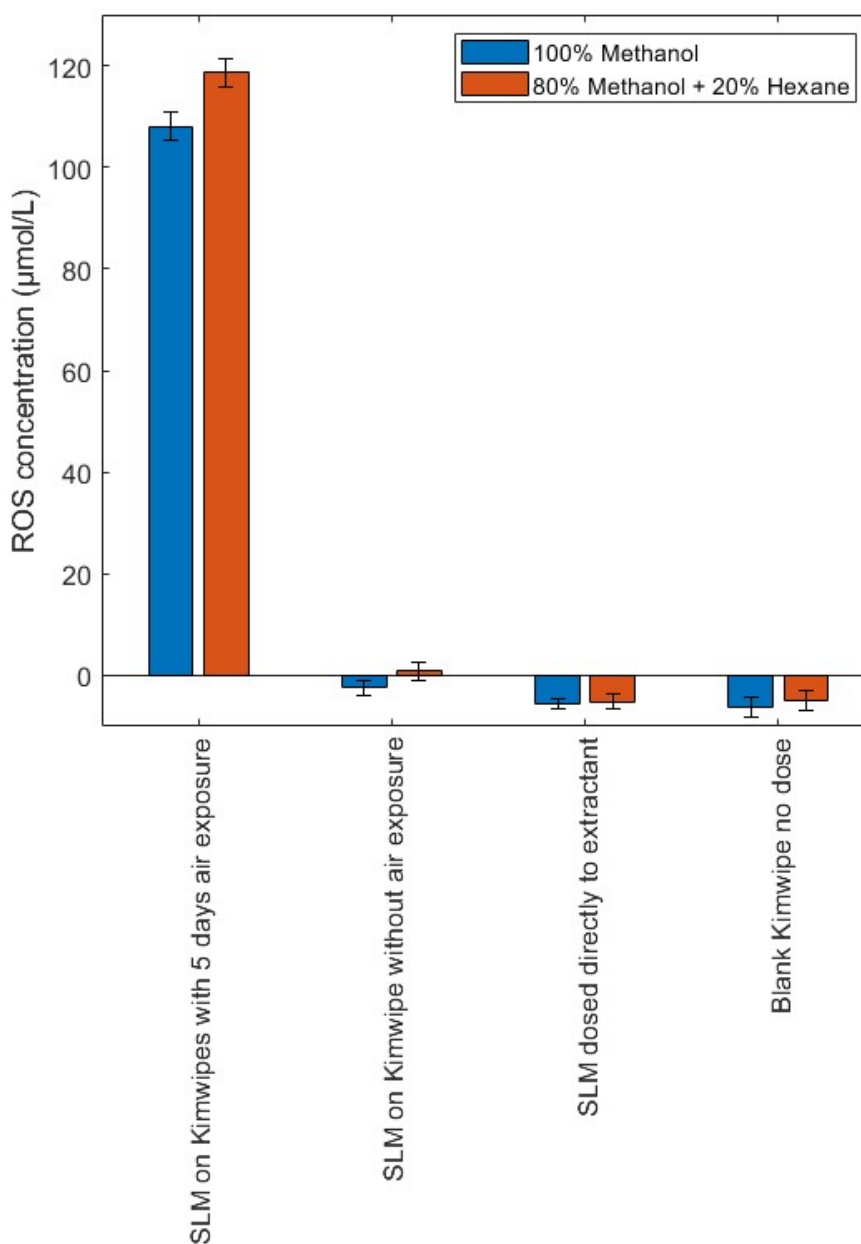

8

9 **Figure S1.** Comparison of ROS extraction using different extracts.

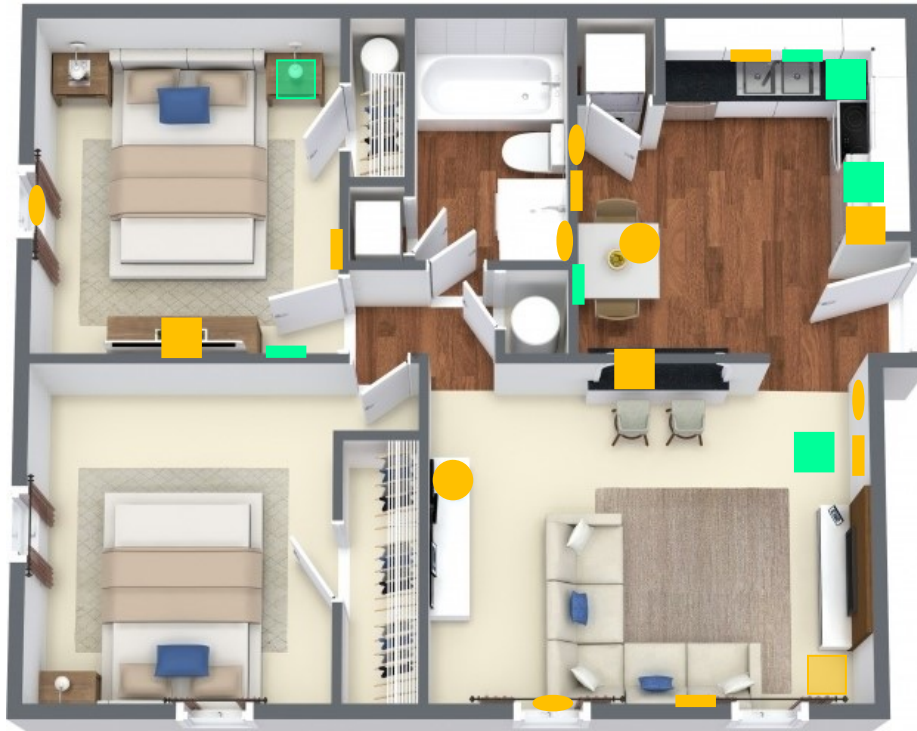

10

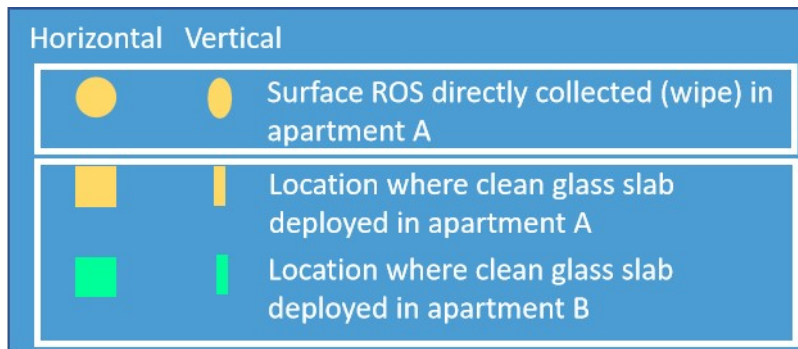

11

12 **Figure S2.** Floor plan of apartment A and B

13

14

15

16

17

18

19

20

21

22

23

24

25

26

27

28 **Table S1.** Surface areas of SLM films on dosed glass plates.

| No. | date deployed | date collected | duration (day) | SLM film area (cm <sup>2</sup> ) |
|-----|---------------|----------------|----------------|----------------------------------|
| 1   | 5/24/2022     | 5/24/2022      | 0              | 85.16                            |
| 2   | 5/23/2022     | 5/24/2022      | 1              | 77.70                            |
| 3   | 5/22/2022     | 5/24/2022      | 2              | 75.93                            |
| 4   | 5/21/2022     | 5/24/2022      | 3              | 60.06                            |
| 5   | 5/20/2022     | 5/24/2022      | 4              | 77.19                            |
| 6   | 5/19/2022     | 5/24/2022      | 5              | 75.48                            |
| 7   | 5/18/2022     | 5/24/2022      | 6              | 84.64                            |
| 8   | 5/17/2022     | 5/24/2022      | 7              | 71.09                            |
| 9   | 5/16/2022     | 5/24/2022      | 8              | 75.41                            |
| 10  | 5/15/2022     | 5/24/2022      | 9              | 73.67                            |
| 11  | 5/14/2022     | 5/24/2022      | 10             | 87.54                            |
| 12  | 5/13/2022     | 5/24/2022      | 11             | 72.93                            |
| 13  | 5/12/2022     | 5/24/2022      | 12             | 77.38                            |
| 14  | 5/11/2022     | 5/24/2022      | 13             | 64.42                            |
| 15  | 5/10/2022     | 5/24/2022      | 14             | 85.09                            |
| 16  | 5/31/2022     | 6/21/2022      | 21             | 81.12                            |
| 17  | 5/31/2022     | 6/28/2022      | 28             | 86.68                            |
| 18  | 5/31/2022     | 7/12/2022      | 42             | 72.48                            |
| 19  | 5/31/2022     | 7/26/2022      | 56             | 66.93                            |

29

30

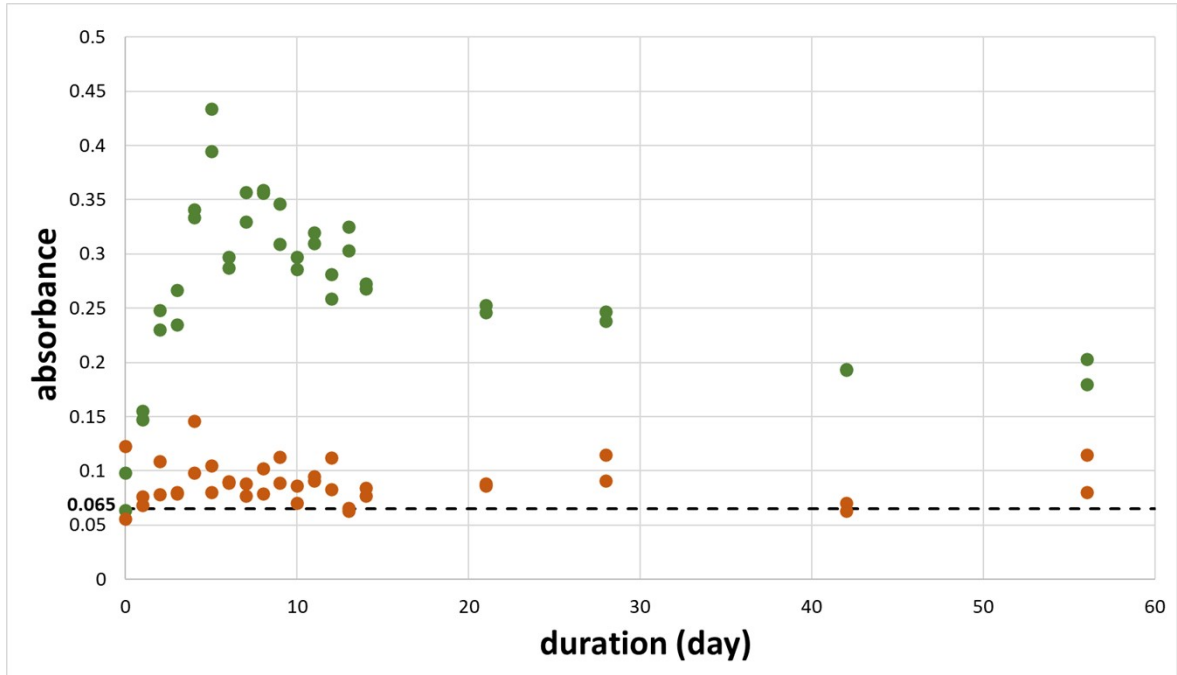

31

32 **Figure S3.** Absorbance of first and second wipe for oil coated glass plates.

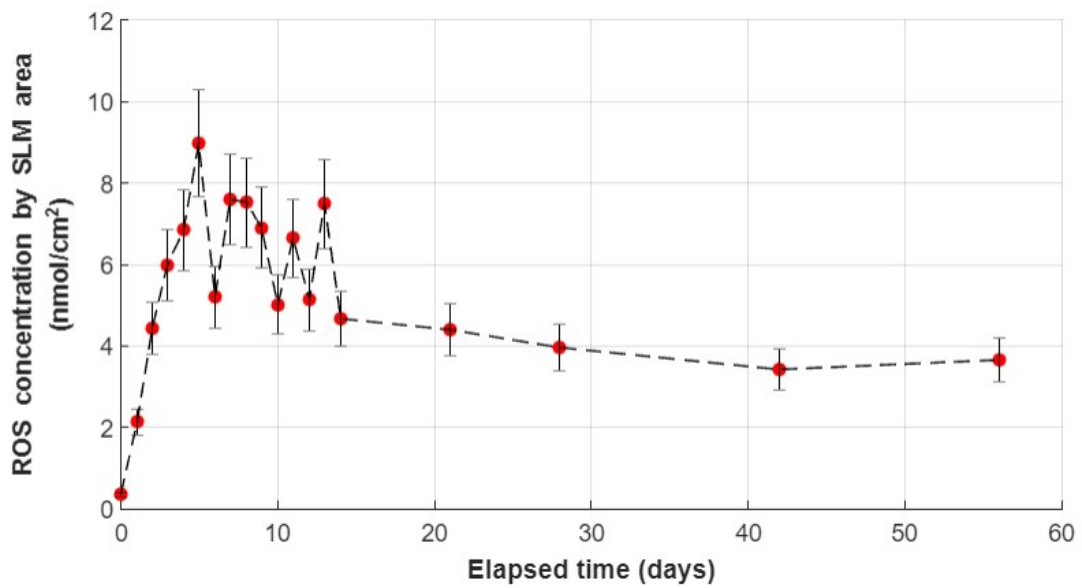

33

34 **Figure S4.** Dynamic ROS area concentration (nmol/cm<sup>2</sup> on oil coated glass plate)

35

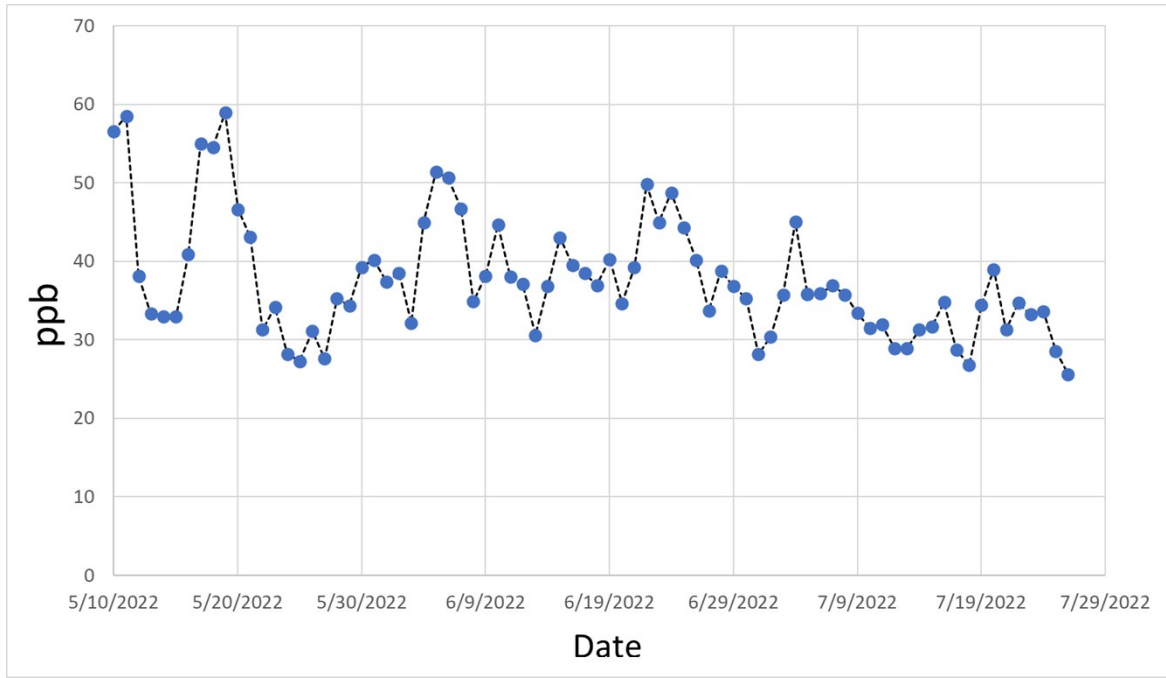

36

37 **Figure S5.** Daily average ozone concentration in lab during coated glass plates

38 experiment.

39

40

41

42
